# Supplementary material for: Thermogravimetric Analysis of Moisture in Natural and Thermally Treated Clay Materials
Source: MDPI journal article supplement (doi:10.3390/ma17102231), 2024-05-09
Supplement: s1 [file s1]

# Supplementary Materials

## Thermogravimetric analysis of moisture in natural and thermally-treated clay materials

Giulia Lo Dico<sup>1,2,3,4</sup>, Lorenzo Lisuzzo<sup>4</sup>, Verónica Carcelén<sup>3</sup>, Giuseppe Cavallaro<sup>4,\*</sup>, and Maciej Haranczyka<sup>1,\*</sup>

<sup>1</sup> IMDEA Materials Institute, C/Eric Kandel 2, 28906 Getafe, Madrid, Spain.

<sup>2</sup> Tolsa Group, Carretera de Madrid a Rivas Jarama, 35, Madrid, Spain.  
glodico@tolsa.com (G.L.)

<sup>3</sup> Department of Materials Science and Engineering, Universidad Carlos III de Madrid, Avda. de la Universidad, 30. 28911 Leganés, Madrid, Spain.  
vcarcelen@tolsa.com (V.C)

<sup>4</sup> Department of Physics and Chemistry, University of Palermo, Viale delle Scienze, pad. 17, 90128 Palermo, Italy. lorenzo.lisuzzo@unipa.it (L.L.)

\* Correspondence: giuseppe.cavallaro@unipa.it (G.C.);  
maciej.haranczyk@imdea.org (M.H.)

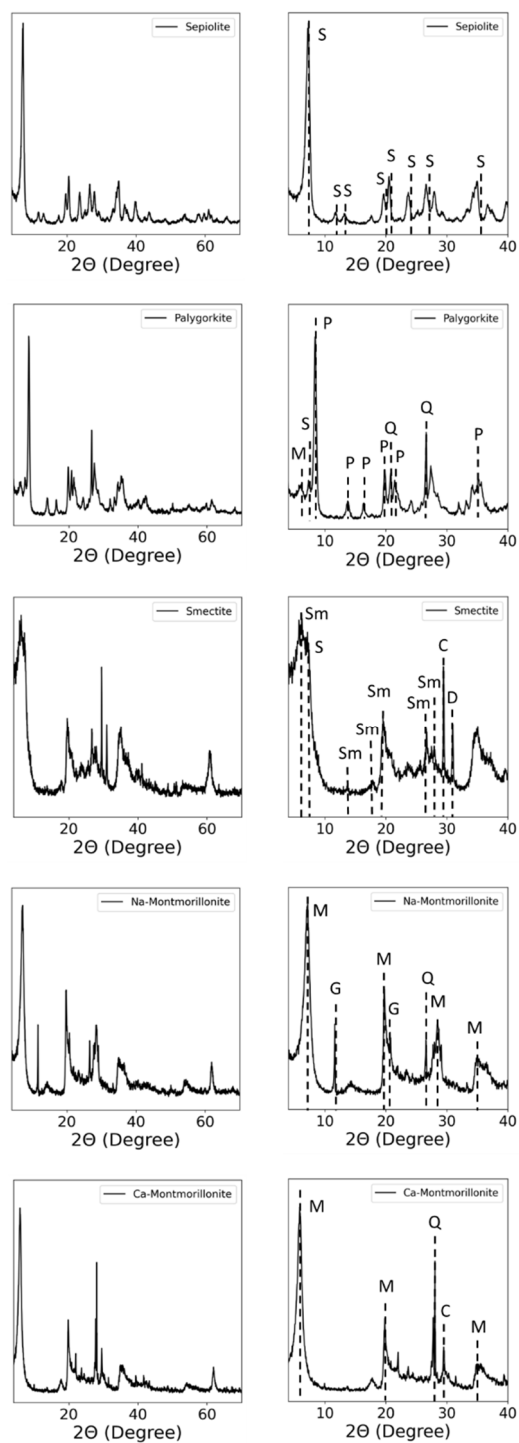

Figure S1. XRD patterns of the studied five samples. The corresponding typical diffraction peaks are highlighted (S=sepiolite, P=palygorkite, Sm=smectite, M=montmorillonite, C=calcite, D=dolomite, Q=quartz).

Table S1. Main crystalline components identified in the XRD patterns.

| Sample name                     | Attapulgite | Sepiolite | Stevensite | Na-montmorillonite | Ca-montmorillonite |
|---------------------------------|-------------|-----------|------------|--------------------|--------------------|
| <b>Sepiolite (%)</b>            | 2           | 98        | 10         | 0                  | 0                  |
| <b>Smectite (%)</b>             | 1           | 0         | 82         | 88                 | 90                 |
| <b>Palygorskite (%)</b>         | 78          | 0         | 0          | 0                  | 0                  |
| <b>Quartz (%)</b>               | 3           | 0         | 1          | 1                  | 1                  |
| <b>Gypsum (%)</b>               | 0           | 0         | 0          | 2                  | 0                  |
| <b>Calcite (%)</b>              | 0           | 0         | 3          | 0                  | 1                  |
| <b>Dolomite (%)</b>             | 0           | 0         | 2          | 0                  | 0                  |
| <b>Total phyllosilicate (%)</b> | 81          | 98        | 92         | 88                 | 90                 |

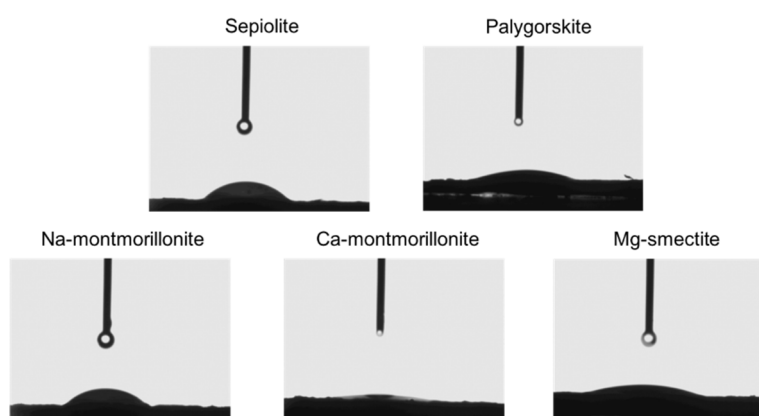

Figure S2. Images of the water droplets just after their deposition on the surface of the five clay samples.

Table S2.  $\beta$ -carotene1 adsorption results for the untreated 5 class of minerals.

| Clay minerals      | $\beta$ -carotene ads (%) <sup>a</sup> |
|--------------------|----------------------------------------|
| Na-Montmorillonite | 30                                     |
| Ca-Montmorillonite | 33                                     |
| Palygorskite       | 24                                     |
| Stevensite         | 35                                     |
| Sepiolite          | 29                                     |

<sup>a</sup> The amount is expressed as % of the adsorbed molecule with respect to the total starting amount (see Method section for details).
